# Supplementary material
Source: Elsevier journal article supplement (https://www.sciencedirect.com/science/article/pii/S0300289623000017)
Supplement: mmc1 [file S0300289623000017:mmc1.docx]

**SUPPLEMENTARY DATA**

TITLE: Tissue-Specific Activated Regulatory T Lymphocytes Immunophenotype in Chronic Rhinosinusitis with Nasal Polyps

**DETAILED EXPLANATIONS OF METHODS**

**Participants**

This study included thirty-one successive patients with severe CRSwNP (following EPOS criteria) (1) that were selected for endoscopic sinus surgery and who met RAND-UCLA criteria (2) were included in the study. Eight subjects undergoing septal surgery with no allergic, nasal, bronchial or systemic inflammatory diseases were recruited as controls. Cases and controls were matched by age.

To be eligible for the study, CRSwNP patients: 1) did not have any asthma or allergic rhinitis exacerbations in the previous three months, 2) had not been infected or undergone any pathological processes in the month prior to the surgery, 3) were not treated with antihistamines, non-steroidal anti-inflammatory drugs, antileukotrienes, oral corticosteroids, parenteral corticosteroids, or inhaled corticosteroids within at least one month prior to obtaining the tissue samples.

Patients with cystic fibrosis, Chronic Obstructive Pulmonary Disease and pregnant or lactating women were excluded from the study.

The presence of Asthma, Allergic Rhinitis and Aspirin Exacerbated Respiratory Disease (AERD) was ascertained according to the criteria previously described by Bousquet J. and colleagues and cited in the Spanish Guideline for the Management of Asthma (GEMA) (3, 4) .

Patients’ disease-specific quality of life was evaluated before surgical intervention using Sino-Nasal Outcome test 22 items (SNOT-22; score range: 0–110). The higher the SNOT-22 score, the worse the sinonasal symptoms (5). Radiological analysis with computed tomography was carried out using the Lund-MacKay Score (LMS) (score range: 0-24). The higher the LMS score, the greater the opacification (6).

All the subjects included in this study signed an informed consent document. The study was conducted according to the guidelines of the Declaration of Helsinki.

**Sample Collection and Processing**

Thirty-one specimens of NP and adjacent nasal mucosa were dissected from the left middle meatus of each CRSwNP patient, at the time of functional endoscopic sinus surgery. Eight specimens of healthy nasal mucosa were obtained from uncinate tissue (left nostril) during septal surgery of control subjects.

NPs and mucosa samples were digested, and stromal vascular cells (SVCs) were separated by centrifugation (7). The frequency of lymphocytes was determined in pelleted SVCs by flow cytometry.

PB was collected from CRSwNP patients and control subjects before surgery. The frequency of lymphocytes was assessed by flow cytometry and biochemical parameters were measured as described below.

**Flow cytometry**

The collected PB, SVCs (pelleted from NP) and mucosa were studied by flow cytometry (7, 8). The cells were acquired and analyzed by six colour cytometer flow cytometry on a FACS CANTO II (Becton Dickinson, San Jose, CA, USA). The frequency of lymphocytes was determined by flow cytometry using antihuman- CD45-APC (Caltag Laboratories, Burlingame, CA, USA), CD3-APC-H7, CD4-PercP-Cy5, CD25-PE-Cy7, and CD127-PE (BD Biosciences, San Jose, CA, USA) and appropriate isotype controls were included, IgG1-PE, IgG1-PerCP, IgG1-PE-Cy7, IgG1-APC, IgG1-APC-H7 (BD Biosciences, San Jose, CA), as described by our group previously (7, 8). Moreover, the Zombie NIR™ Fixable Viability Kit (Biolegend, San Diego, CA) was used to evaluate the viability of cells by flow cytometry, following the manufacturer’s instructions. The cell viability was >95%. Results were analyzed by six colour cytometer flow cytometry on a FACS CANTO II flow cytometer. Data were analysed using FACS DIVA 6.0 (BD Biosciences, San Jose, CA) and FlowJo software (Tree Star, Ashland, OR). The gate strategies followed to assess CD3, CD4, CD8, CD4CD25CD127Low/- and CD4CD25CD127Low/- T lymphocytes using flow cytometry are shown in Figure S1 and Figure S2. Results were expressed as percentage of CD3, CD4, CD8, CD4CD25CD127Low/- and CD4CD25CD127Low/- respect to parental lymphocytes.

**Statistical Analysis**

Statistical analysis for non-related samples were performed using the Kruskal-Wallis followed by Dunn´s test to detect differences between multiple groups and the Mann-Whitney U test for comparison between two groups. Spearman correlation coefficients were calculated to estimate the correlations between the variables. Values were considered to be statistically significant when *p ≤* 0.05. The results are expressed as median and first quartile (Q1) and third quartile (Q3). All analyses were performed using GraphPad, version 8.0.1 and SPSS, version 26.

**METHODS REFERENCES**

1. Fokkens WJ, Lund VJ, Hopkins C, Hellings PW, Kern R, Reitsma S, et al. Executive summary of EPOS 2020 including integrated care pathways. Rhinology. 2020;58:82-111.

2. Rudmik L, Soler ZM, Hopkins C, Schlosser RJ, Peters A, White AA, et al. Defining appropriateness criteria for endoscopic sinus surgery during management of uncomplicated adult chronic rhinosinusitis: a RAND/UCLA appropriateness study. Rhinology. 2016;54:117-28.

3. Bousquet J, Khaltaev N, Cruz AA, Denburg J, Fokkens WJ, Togias A, et al. Allergic Rhinitis and its Impact on Asthma (ARIA) 2008 update (in collaboration with the World Health Organization, GA(2)LEN and AllerGen). Allergy. 2008;63 Suppl 86:8-160.

4. Executive Committee G. GEMA 2009 (Spanish guideline on the management of asthma). Journal of investigational allergology & clinical immunology. 2010;20 Suppl 1:1-59.

5. Kennedy JL, Hubbard MA, Huyett P, Patrie JT, Borish L, Payne SC. Sino-nasal outcome test (SNOT-22): a predictor of postsurgical improvement in patients with chronic sinusitis. Annals of allergy, asthma & immunology : official publication of the American College of Allergy, Asthma, & Immunology. 2013;111:246-51 e2.

6. Lund VJ, Kennedy DW. Staging for rhinosinusitis. Otolaryngology--head and neck surgery : official journal of American Academy of Otolaryngology-Head and Neck Surgery. 1997;117:S35-40.

7. Lopez S, Garcia-Serrano S, Gutierrez-Repiso C, Rodriguez-Pacheco F, Ho-Plagaro A, Santiago-Fernandez C, et al. Tissue-Specific Phenotype and Activation of iNKT Cells in Morbidly Obese Subjects: Interaction with Adipocytes and Effect of Bariatric Surgery. Obesity surgery. 2018.

8. Rondon C, Dona I, Lopez S, Campo P, Romero JJ, Torres MJ, et al. Seasonal idiopathic rhinitis with local inflammatory response and specific IgE in absence of systemic response. Allergy. 2008;63:1352-8.

**SUPLEMENTARY FIGURES**


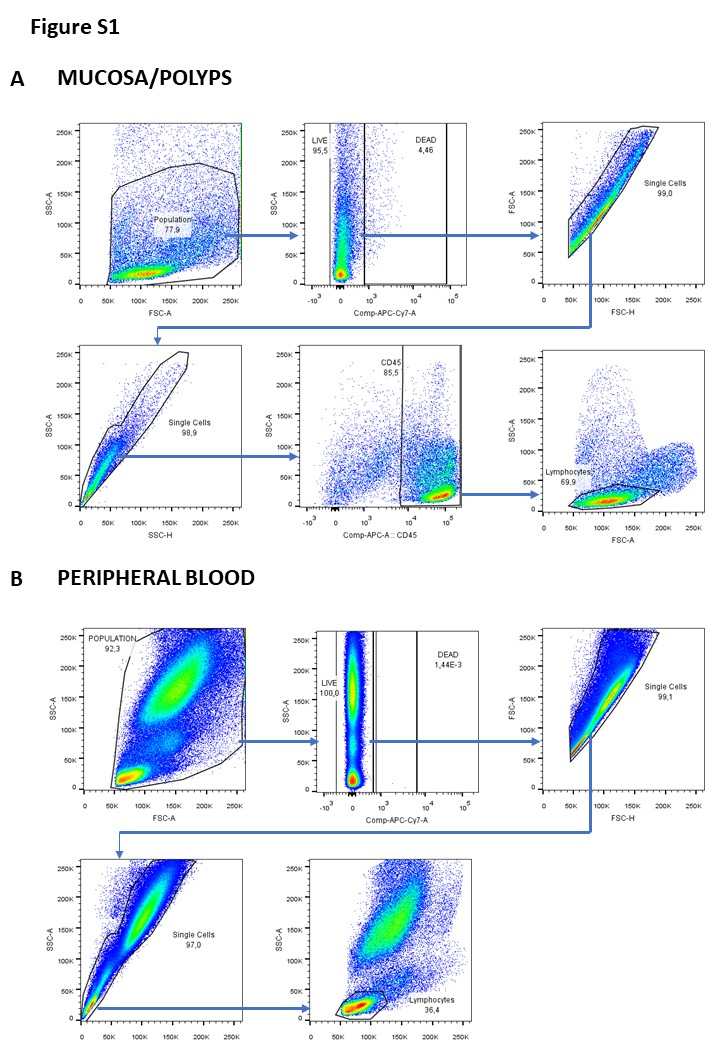


**Supplementary Figure S1.** Flow cytometry gating strategy of nasal tissue and peripheral blood. Representative gating strategy to determine lymphocytes population in nasal mucosa and polyp samples (A) and peripheral blood (B). Cells were first gated for live cells (SSC-A vs. live/dead stain), singlets (FSC-H vs. FSC-A and SSC-H vs. SSCA) and CD45+ cells (SSC-A vs. CD45). The lymphocyte gate is analyzed for FSC-A vs SSC-A.

**
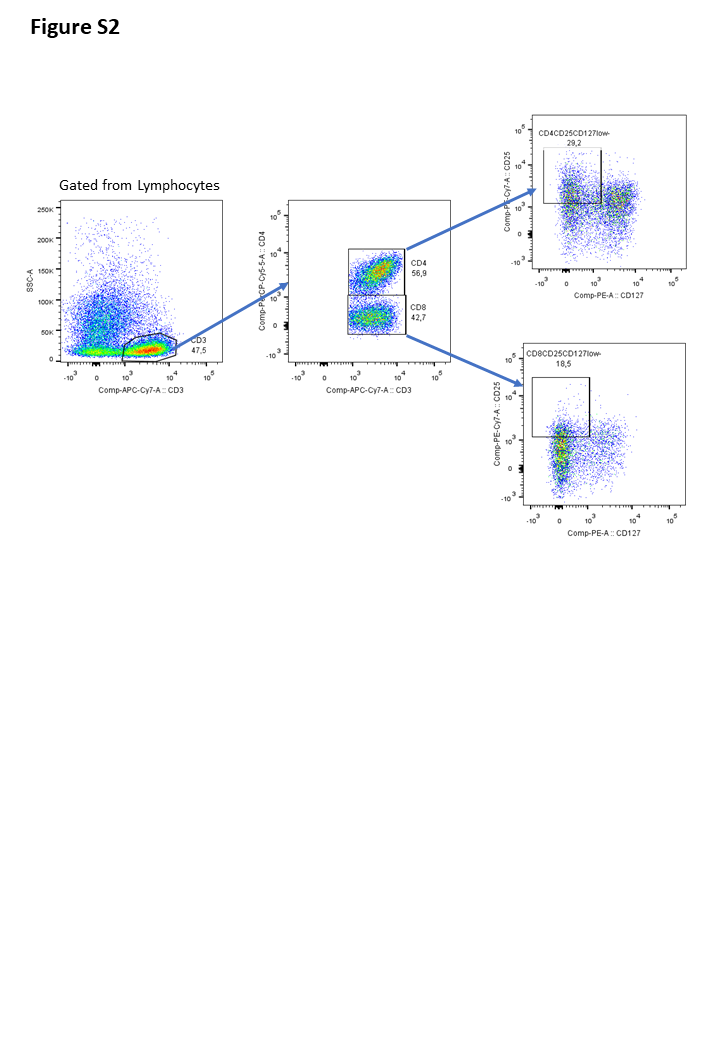
**

**Supplementary Figure S2.** Lymphocytes gating strategy. Representative gating strategy of different lymphocytes subpopulations as T (helper and cytotoxic) or CD3 (CD4 and CD8). Moreover, regulatory T (helper and cytotoxic) cells are studied using for their expression of CD4CD25CD127Low/- and CD8CD25CD127Low/-,respectively.
